# Supplementary material for: Phase and morphology of calcium carbonate precipitated by rapid mixing in the absence of additives
Source: Royal Society of Chemistry journal article supplement (doi:10.1039/d2ra03507c), 2022-01-01
Supplement: d2ra03507c1.pdf [file d2ra03507c1.pdf]

# **Phase and morphology of calcium carbonate precipitated by rapid mixing in the absence of additives**

*Kyungsun Song\*, Jun-Hwan Bang, Soo-Chun Chae, Jeongyun Kim, and Seung-Woo Lee*

Korea Institute of Geoscience & Mineral Resources (KIGAM), Gwahang-no 124, Yuseong-gu,  
Daejeon, 34132, Republic of Korea

## **Corresponding Author**

Kyungsun Song — *Korea Institute of Geoscience & Mineral Resources (KIGAM), Gwahang-no 124, Yuseong-gu, Daejeon, 34132, Republic of Korea*

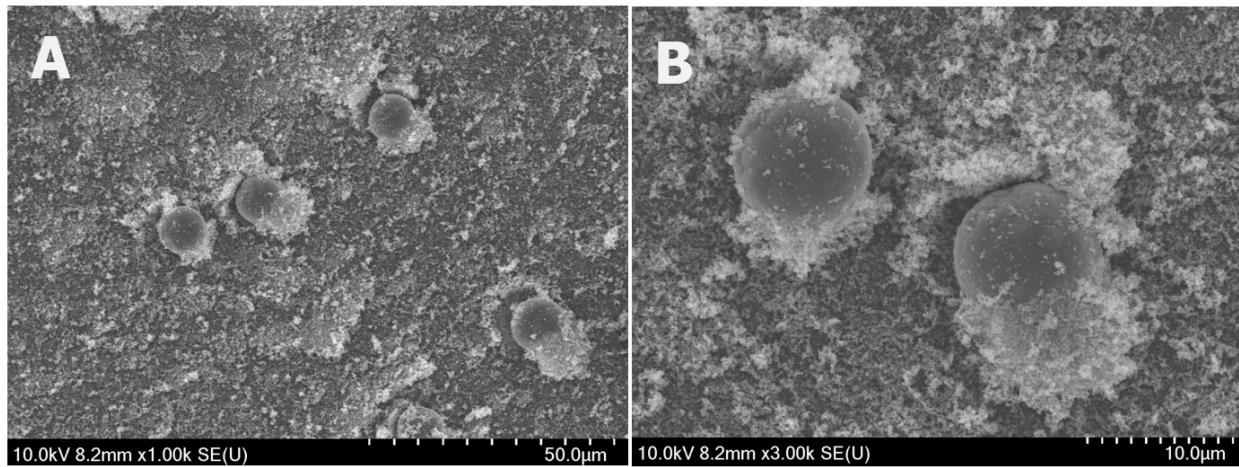

Figure S1. FE-SEM images of the precipitated ACC particles obtained after the rapid mixing of equal volumes at magnifications of (A) 1 K and (B) 3 K.

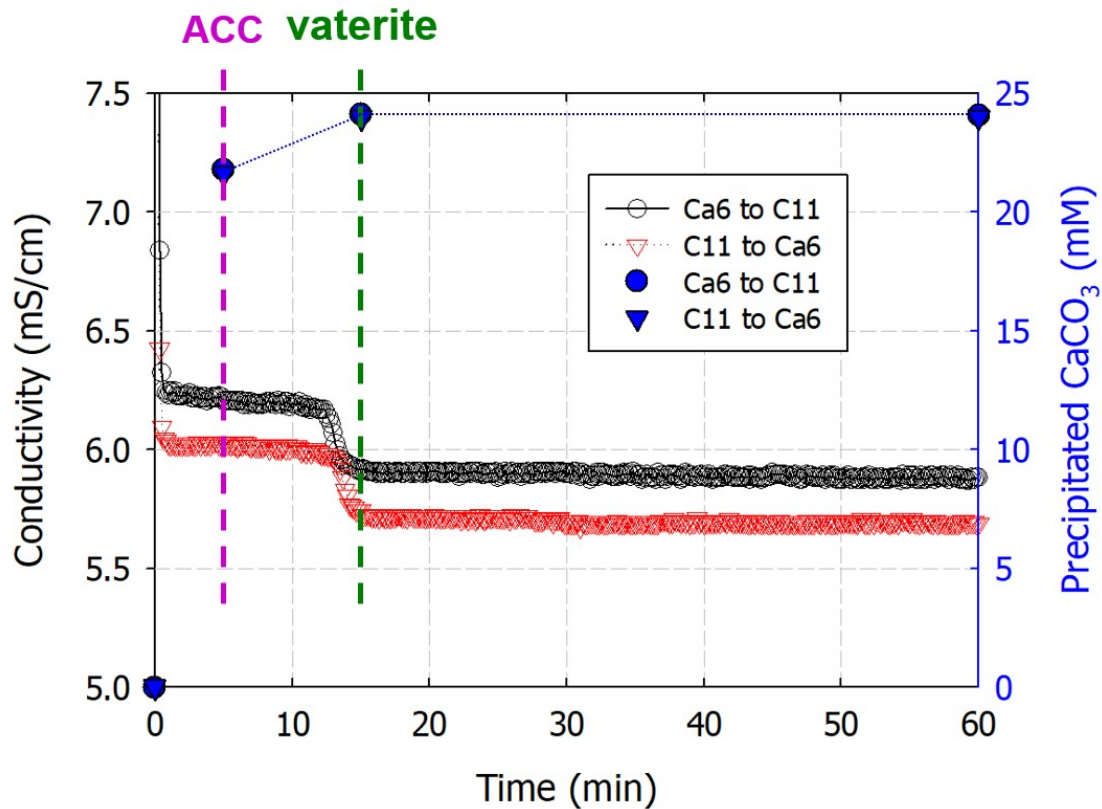

Figure S2. Variations of the conductivity and amount of precipitated CaCO<sub>3</sub> particles with time after rapid mixing of equal volumes of the 50 mM Ca6/C11. Ca and C represent the calcium chloride and sodium (bi)carbonate solutions, respectively, and the adjacent numbers represent the starting pH values of the individual solutions.

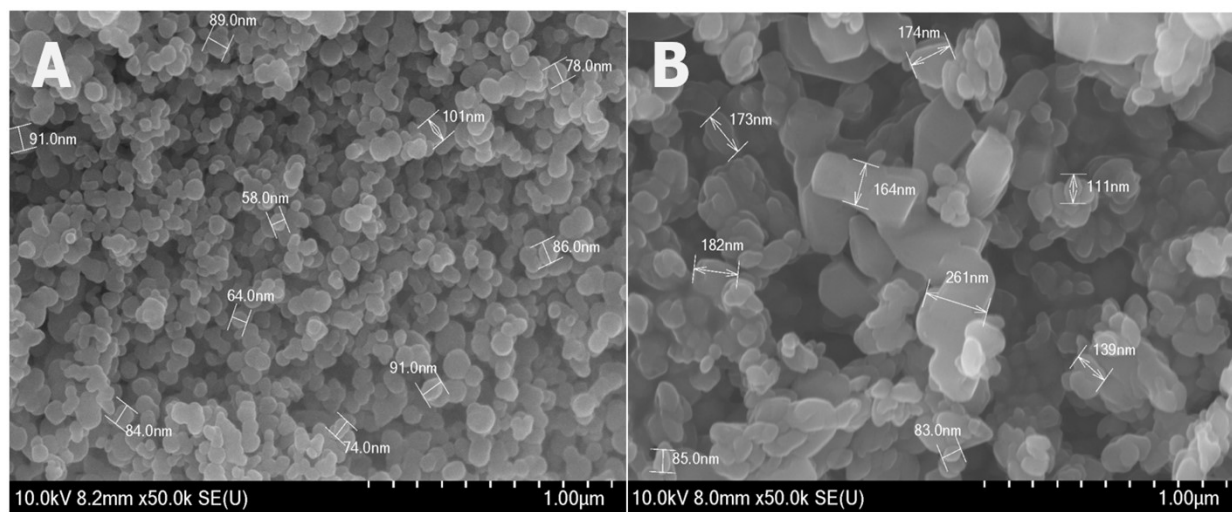

Figure S3. FE-SEM images of the precipitated ACC particles obtained after the rapid mixing of equal volumes of the (A) 50 mM and (B) 20 mM reactant solutions.

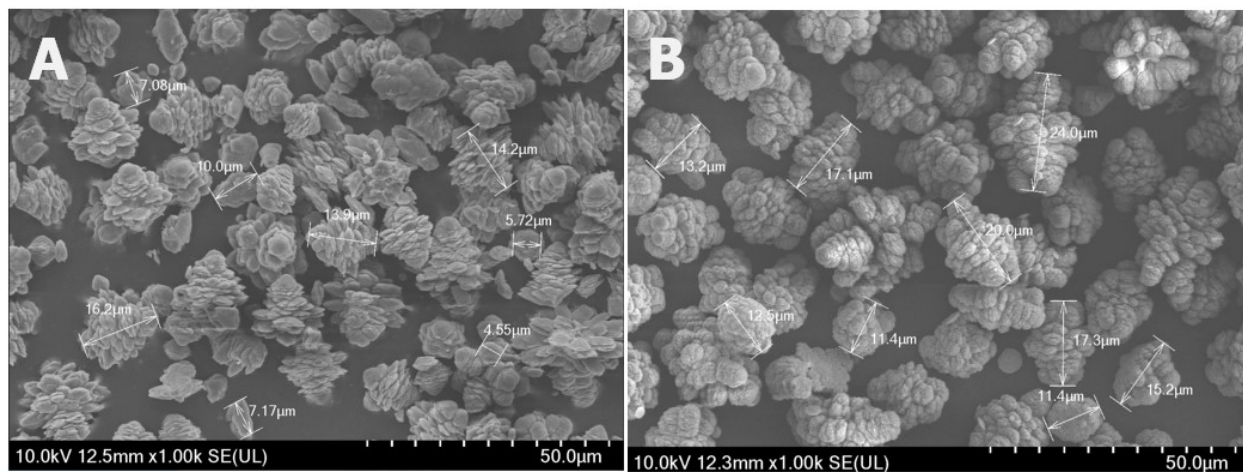

Figure S4. FE-SEM images of the precipitated vaterite particles obtained after the rapid mixing of equal volumes of the 50 mM calcium chloride and sodium (bi)carbonate solutions. (A)  $\text{NaHCO}_3$  and (B)  $\text{NaHCO}_3/\text{Na}_2\text{CO}_3$  (50/50 vol.%) at initial pH values of 8.7 and 10.4, respectively.
